# Supplementary material
Source: PubMed Central journal article supplement (PMC2915723)
Supplement: supp_M110.133280_jbc.M110.133280-1.pdf [file supp_M110.133280_jbc.M110.133280-1.pdf]

Table S1: Subjects information

| Subjects     | Cases number                                                                                          | Sources |
|--------------|-------------------------------------------------------------------------------------------------------|---------|
| Normal (10)  | #1, #2, #3, #5, #6, #7, #8, #10, #12, #13 (leukocytes genomic DNA)                                    | Spain   |
| CADASIL (14) | #55, #67, #69, #88, #90, #98, #116, #138, #141, #178, #179, #180, #181, #217 (leukocytes genomic DNA) | Spain   |

| Subjects     | Cases number                                                                                                                                                                                                                                    | Sources |
|--------------|-------------------------------------------------------------------------------------------------------------------------------------------------------------------------------------------------------------------------------------------------|---------|
| Normal (24)  | #254, #255, #256, #257, #258, #259, #260, #261, #262, #263, #264, #265, #266, #267, #268, #269, #270, #271, #272, #273, #274, #275, #276, #277 (leukocytes genomic DNA)                                                                         | Spain   |
| CADASIL (36) | #187, #188, #189, #190, #191, #193, #194, #195, #196, #197, #199, #201, #202, #203, #204, #205, #206, #207, #208, #209, #210, #211, #213, #214, #215, #216, #218, #219, #220, #221, #222, #223, #224, #225, #226, #227 (leukocytes genomic DNA) | Spain   |

Table S2: Notch3 mutations identified in the fourteen CADASIL patients

|       |                                                                                                                                                                                               |
|-------|-----------------------------------------------------------------------------------------------------------------------------------------------------------------------------------------------|
| Spain | #55 (R607C), #67 (R153C), #69 (R207C), #88 (G1013C), #90 (Y189C), #98 (C428S), #116 (R169C), #138 (C428S), #141 (R1031C), #178 (R182C), #179 (Y220C), #180 (R110C), #181 (R207C), #217 (R90C) |
|-------|-----------------------------------------------------------------------------------------------------------------------------------------------------------------------------------------------|
